# Supplementary material
Source: PubMed Central journal article supplement (PMC4939239)

- MDA\_Amos\_Spitz\_Wu\_CASE
- MDA\_Amos\_Spitz\_Wu\_CONTROL
- MDA\_McNeil\_CASE
- MDA\_McNeil\_CONTROL
- MDAnderson\_CASE
- MDAnderson\_CONTROL
- MEC\_CASE
- MEC\_CONTROL
- NCI-UMD\_CASE
- NCI-UMD\_CONTROL
- PLCO\_CASE
- PLCO\_CONTROL
- SCCS\_CASE
- SCCS\_CONTROL
- UCSF\_CASE
- UCSF\_CONTROL
- WayneState\_CASE
- WayneState\_CONTROL

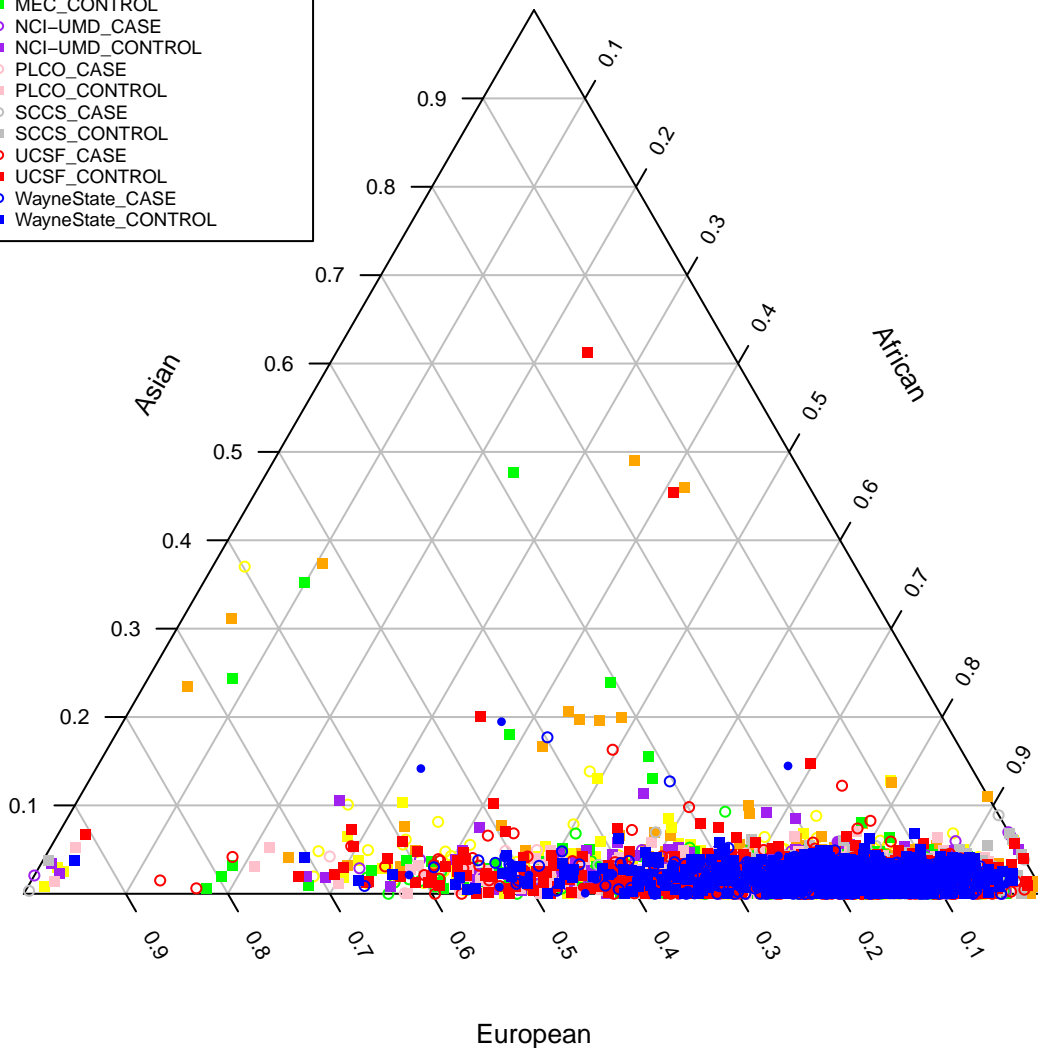

Supplement: NIHMS792148-supplement-8.pdf [file NIHMS792148-supplement-8.pdf]
