# Supplementary material
Source: PubMed Central journal article supplement (PMC4939239)

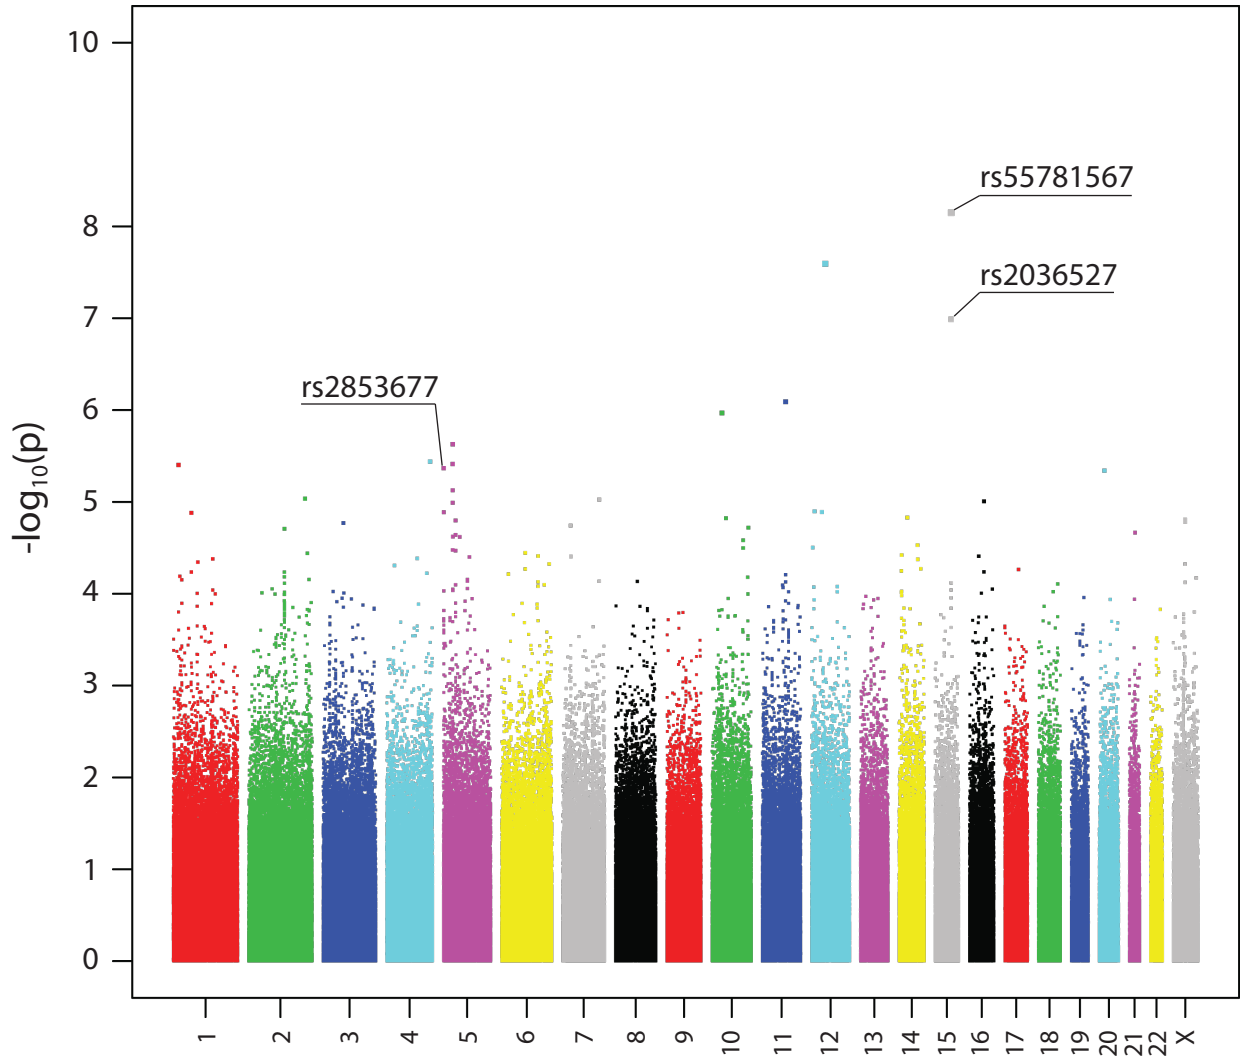

Supplement: NIHMS792148-supplement-10.pdf [file NIHMS792148-supplement-10.pdf]

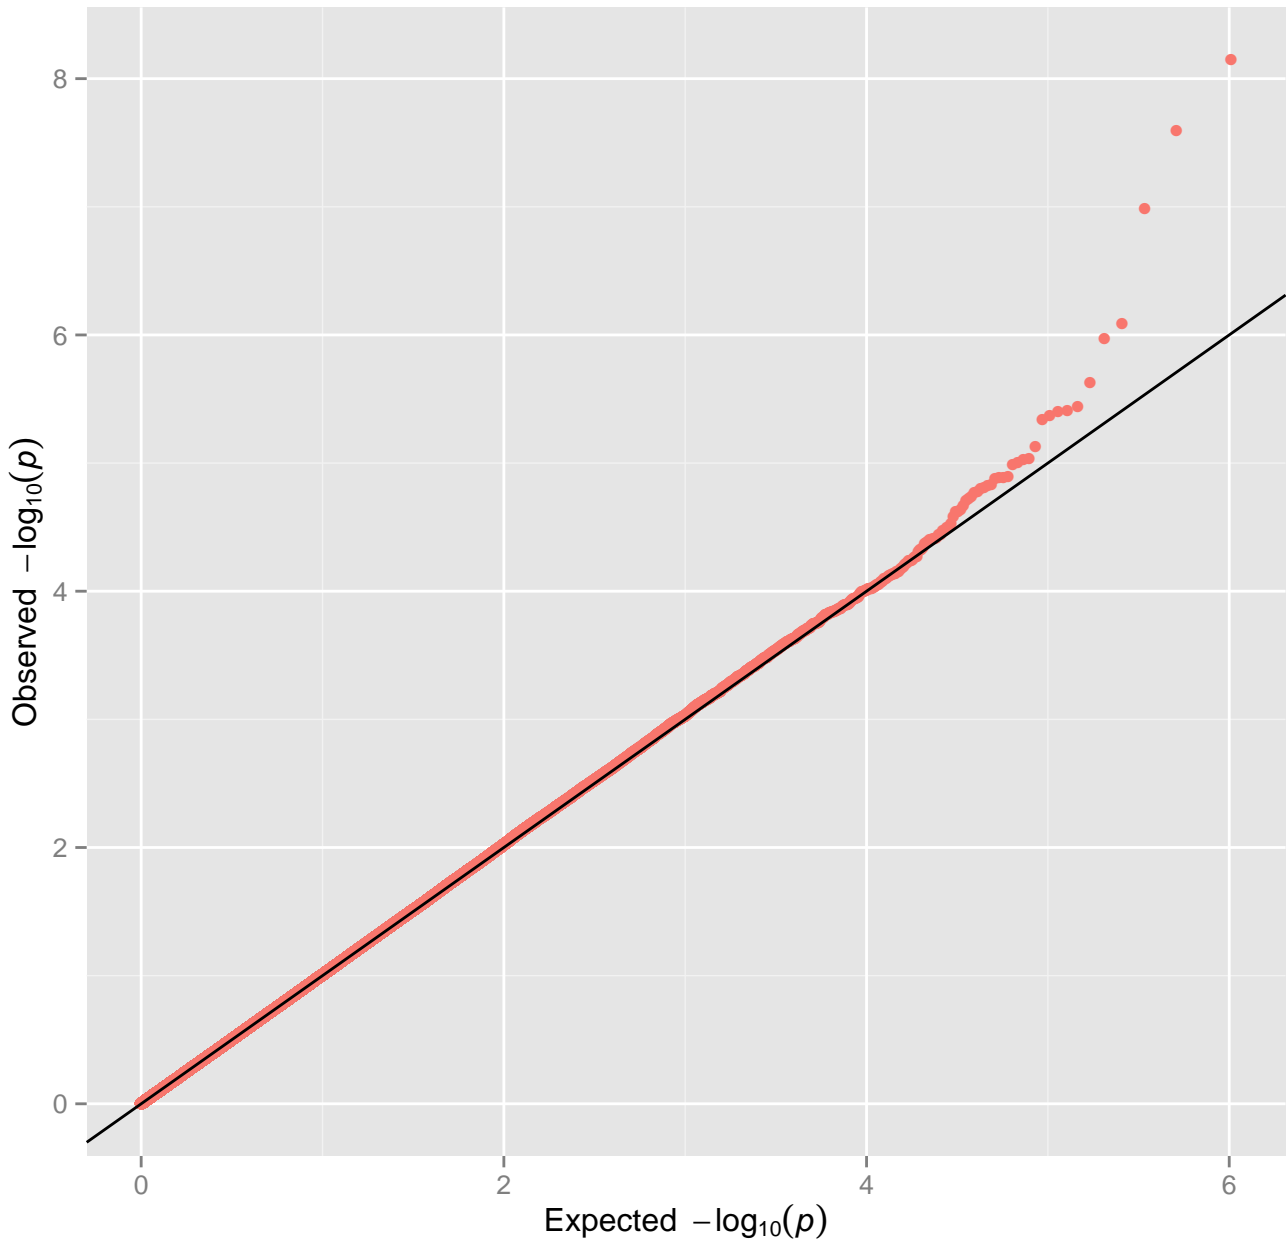

Supplement: NIHMS792148-supplement-9.pdf [file NIHMS792148-supplement-9.pdf]
